# Supplementary material
Source: publisher figshare collection journal article supplement (https://diabetesjournals.figshare.com/articles/dataset/_/13874705)
Supplement: Supplementary file 1 [file 1]

The NiPPeR Study Group authors for the Medline citation comprises: Veronica Boyle (v.boyle@auckland.ac.nz), Shirong Cai (obgcais@nus.edu.sg), Ryan Carvalho (Ryan.Carvalho@nestle.com), Julie Ann Guiao Castro (julie\_castro@nuhs.edu.sg), Mary Cavanagh (m.cavanagh@auckland.ac.nz), Hsin Fang Chang (hsin\_fang\_chang@nuhs.edu.sg), Claudia Chi (drclaudiachi@gmail.com), Caroline E Childs (C.E.Childs@soton.ac.uk), Mary F Chong (mary\_chong@nus.edu.sg), Cathryn Conlon (C.Conlon@massey.ac.nz), Cyrus Cooper (cc@mrc.soton.ac.uk), Paula Costello (pc@mrc.soton.ac.uk), Vanessa Cox (vac@mrc.soton.ac.uk), Marilou Ebreo (marilou\_ebreo@nuhs.edu.sg), Judith Hammond (j.hammond@auckland.ac.nz), Nicholas C Harvey (nch@mrc.soton.ac.uk), Richard Holt ([R.I.G.Holt@soton.ac.uk](mailto:R.I.G.Holt@soton.ac.uk)), Hazel M Inskip (hmi@mrc.soton.ac.uk), Mrunalini Jagtap (mrunalini\_jagtap@sics.a-star.edu.sg), Neerja Karnani (neerja\_karnani@sics.a-star.edu.sg), Gene Jeon (Gene.Jeon@middlemore.co.nz), Yung Seng Lee (paelees@nus.edu.sg), Karen Lillycrop (K.A.Lillycrop@soton.ac.uk), See Ling Loy (Loy.See.Ling@kkh.com.sg), Lesley McCowan (l.mccowan@auckland.ac.nz), Pamela A Mahon (pam@mrc.soton.ac.uk), Chiara Nembrini (Chiara.Nembrini@rdls.nestle.com), Sharon Ng (sharon.ng.kmu@gmail.com), Justin M O'Sullivan (justin.osullivan@auckland.ac.nz), Judith Ong (judith\_ong@nuhs.edu.sg), Gernalia Satianegara (gernalia\_satianegara@sics.a-star.edu.sg), Lynette Pei-Chi Shek (lynette\_shek@nuhs.edu.sg), Shu E Soh (shu\_e\_soh@nuhs.edu.sg), Irma Silva-Zolezzi (Irma.SilvaZolezzi@rdls.nestle.com), Karen Tan (karen\_tan@sics.a-star.edu.sg), Vicky Tay (hktay@sics.a-star.edu.sg), Rachael Taylor (rachael.taylor@otago.ac.nz), Elizabeth Tham (elizabeth\_tham@nuhs.edu.sg), Mya Thway Tint (obgmtt@nus.edu.sg), Mark Vickers (m.vickers@auckland.ac.nz), Clare Wall (c.wall@auckland.ac.nz), Gladys Woon ([gladys\\_oon@nuhs.edu.sg](mailto:gladys_oon@nuhs.edu.sg)), Wong Jui-Tsung Ray (ray\_wong@sics.a-star.edu.sg), Wei Ying (ying\_wei@nuhs.edu.sg), Mei Ling Chang ([changmeiling86@gmail.com](mailto:changmeiling86@gmail.com)), Hannah Yong (hannah\_yong@sics.a-star.edu.sg).
