# Supplementary material
Source: publisher figshare collection journal article supplement (https://diabetesjournals.figshare.com/articles/dataset/_/13874705)
Supplement: Supplementary file 2 [file 1]

**Supplemental Table S1. *Per protocol* analysis of primary outcome and maternal glycemia in pre-specified special interest groups**

| OGTT time point                                                       | N   | Adjusted Beta (95% CI)<br>for log <sub>e</sub> glucose*<br>(log <sub>e</sub> mmol/L) | N   | Fully adjusted Beta (95% CI)<br>for log <sub>e</sub> glucose†<br>(log <sub>e</sub> mmol/L) | GDM‡<br><br>Control | Intervention | Adjusted risk ratio (95% CI)§ |
|-----------------------------------------------------------------------|-----|--------------------------------------------------------------------------------------|-----|--------------------------------------------------------------------------------------------|---------------------|--------------|-------------------------------|
| <b>Per protocol analyses<sup>  </sup> (N=553)</b>                     |     |                                                                                      |     |                                                                                            |                     |              |                               |
| Fasting                                                               | 552 | -0.0034 ( -0.018 to 0.012)                                                           | 549 | 0.0003 ( -0.014 to 0.015)                                                                  | 58/266              | 69/279       | 1.24 (0.92 to 1.66; N=515)    |
| 1-hour                                                                | 545 | 0.027 ( -0.014 to 0.067)                                                             | 542 | 0.038 (-0.002 to 0.077)                                                                    | (21.8%)             | (24.7%)      |                               |
| 2-hour                                                                | 546 | 0.048 (0.011 to 0.085)                                                               | 543 | 0.052 (0.014 to 0.090)                                                                     |                     |              |                               |
| <b>Overweight or obese prior to conception¶ (N=258)</b>               |     |                                                                                      |     |                                                                                            |                     |              |                               |
| Fasting                                                               | 258 | -0.010 (-0.035 to 0.014)                                                             | 257 | -0.0005 (-0.025 to 0.024)                                                                  | 39/125              | 42/128       | 1.18 (0.83 to 1.69; N=239)    |
| 1-hour                                                                | 253 | 0.017 (-0.038 to 0.072)                                                              | 252 | 0.032 (-0.024 to 0.088)                                                                    | (31.2%)             | (32.8%)      |                               |
| 2-hour                                                                | 254 | 0.069 (0.015 to 0.122)                                                               | 253 | 0.076 (0.020 to 0.131)                                                                     |                     |              |                               |
| <b>Documented evidence of dysglycemia prior to conception# (N=94)</b> |     |                                                                                      |     |                                                                                            |                     |              |                               |
| Fasting                                                               | 94  | 0.003 (-0.047 to 0.053)                                                              | 92  | 0.018 (-0.034 to 0.070)                                                                    | 26/48               | 26/46        | 1.21 (0.86 to 1.71; N=86)     |
| 1-hour                                                                | 93  | 0.062 (-0.022 to 0.146)                                                              | 91  | 0.081 (-0.008 to 0.169)                                                                    | (54.2%)             | (56.5%)      |                               |
| 2-hour                                                                | 93  | 0.048 (-0.045 to 0.140)                                                              | 91  | 0.072 (-0.022 to 0.166)                                                                    |                     |              |                               |

\*log<sub>e</sub> glucose at 24-32 weeks adjusted for site, ethnicity and baseline log<sub>e</sub> glucose (for fasting and 2-hour only, baseline 60 min glucose not available).

†log<sub>e</sub> glucose at 24-32 weeks adjusted for site, ethnicity, maternal age, pre-pregnancy BMI, preconception smoking, parity, family history of diabetes and baseline log<sub>e</sub> glucose (for fasting and 2-hour only, baseline 1-hour glucose not available).

‡Gestational diabetes (GDM) defined by the IADPSG criteria (fasting glucose ≥5.1 mmol/L or 1-hour glucose ≥10.0 mmol/L or 2-hour glucose ≥8.5 mmol/L); includes only women with complete OGTT data at all 3 time points.

§Adjusted for site, ethnicity, maternal age, preconception BMI, household income level, parity, preconception smoking, preconception baseline fasting glycemia, family history of diabetes and offspring sex.

||sensitivity analysis excluding those who violated the eligibility criteria (11 stopped hormonal contraception less than 28 days before recruitment, 1 conceived by assisted reproductive technologies) and those who were non-compliant (20 with <60% adherence; [3 and 0 in the control and intervention groups, respectively, completely stopped consumption during pregnancy prior to the 28-week OGTT.](#)

¶defined using ethnic-specific thresholds of BMI >23 kg/m<sup>2</sup> for Asians including Chinese, Indians, Pakistani, Bangladeshi, Malay, mixed Asian; >25 kg/m<sup>2</sup> for non-Asians including White Caucasian, Polynesian, Black, mixed Asian-non-Asian.

#defined as at least one of the following: GDM in a previous pregnancy; preconception baseline first visit raised HbA1C (≥5.7% (39mmol/mol) or impaired fasting glucose (5.6 to 6.9 mmol/L) or impaired glucose tolerance (2-hour glucose 7.8 to 11.0 mmol/L) [*American Diabetes Association. 2. Classification and diagnosis of diabetes: standards of medical Care in Diabetes-2019. Diabetes Care. 2019; 42:S13–28.*]

**Supplemental Table S2. Other pre-specified pregnancy and neonatal outcomes with the NiPPeR intervention compared with control**

|                                                                                                            | Control       | Intervention              | Effect of Intervention<br>Risk ratio (95% CI) <sup>§</sup> |
|------------------------------------------------------------------------------------------------------------|---------------|---------------------------|------------------------------------------------------------|
| Fetal death <i>in utero</i> or stillbirth $\geq 24$ weeks<br>(denominator all pregnancies $\geq 24$ weeks) | 0/292 (0.0%)  | 1/294 (0.3%) <sup>†</sup> | Insufficient to analyze                                    |
| Shoulder dystocia requiring recognized manoeuvres for delivery                                             | 2/292 (0.7%)  | 4/293 (1.4%)              | Insufficient to analyze                                    |
| <b>Neonatal outcomes</b> (denominator: all livebirths $\geq 24$ weeks)                                     | ...           | ...                       | ...                                                        |
| Macrosomia (>4 kg)                                                                                         | 21/292 (7.2%) | 21/293 (7.2%)             | 0.94 (0.53 to 1.69, N=553)                                 |
| Low birthweight (<2.5 kg)                                                                                  | 21/292 (7.2%) | 16/293 (5.5%)             | 0.78 (0.40 to 1.51, N=553)                                 |
| Neonatal death (within 4 weeks of birth)                                                                   | 0/292 (0.0%)  | 1/293 (0.3%) <sup>‡</sup> | Insufficient to analyze                                    |
| Jaundice requiring phototherapy                                                                            | 24/292 (8.2%) | 23/293 (7.8%)             | 0.91 (0.55 to 1.51, N=553)                                 |
| Low Apgar score (<7) at 5 minutes                                                                          | 3/288 (1.0%)  | 4/288 (1.4%)              | Insufficient to analyze                                    |
| Meconium aspiration                                                                                        | 3/292 (1.0%)  | 6/293 (2.0%)              | Insufficient to analyze                                    |
| Respiratory distress requiring Continuous Positive Airway Pressure (CPAP) or ventilation                   | 5/292 (1.7%)  | 7/293 (2.4%)              | Insufficient to analyze                                    |
| Hypoxic ischemic encephalopathy                                                                            | 1/292 (0.3%)  | 0/293 (0.0%)              | Insufficient to analyze                                    |

<sup>§</sup> Adjusted for site, ethnicity, maternal age, preconception BMI, household income level, parity, smoking during pregnancy, offspring sex, fasting glucose at 28 weeks' gestation.

<sup>†</sup> Intrauterine death at term associated with placental infarctions (reported on histopathology)

<sup>‡</sup> Death due to extreme prematurity with delivery at 24<sup>+3</sup> weeks' gestation

**Supplemental Table S3. Other serious adverse events reported in all randomized women between randomization and 4 weeks post-delivery or withdrawal from study**

|                                   | Control       | Intervention  |
|-----------------------------------|---------------|---------------|
| <b>All other maternal</b>         | 2.3% (20/859) | 2.8% (24/870) |
| Obstetric                         | 4             | 6             |
| Gynecological                     | 4             | 3             |
| Infection/suspected infection     | 4             | 6             |
| Gastrointestinal/surgical         | 3             | 2             |
| Cardiac/renal                     | 2             | 1             |
| Breast                            | 0             | 3*            |
| Neurological/mental/psychological | 1             | 1             |
| Accidents/trauma                  | 2             | 2             |

\*2 cases of mastitis requiring i.v. antibiotics and 1 case of breast cancer
